# Supplementary material
Source: PubMed Central journal article supplement (PMC3285479)
Supplement: NIHMS347437-supplement-Supplementary_Data.pdf [file NIHMS347437-supplement-Supplementary_Data.pdf]

SUPPLEMENTARY TABLES AND LEGENDS

SUPPLEMENTARY TABLE 1

| CHARACTERISTIC                              | GROUP      |             |            | STATISTICAL COMPARISONS ACROSS GROUPS | STATISTICAL COMPARISONS BETWEEN GROUPS |                             |
|---------------------------------------------|------------|-------------|------------|---------------------------------------|----------------------------------------|-----------------------------|
|                                             | HC         | COS         | SIB        |                                       | HC vs COS                              | HC vs SIB                   |
| <i>Number</i>                               | 208        | 83          | 62         |                                       |                                        |                             |
| <i>Sex, No</i>                              |            |             |            | $\chi^2=0.64, p=0.73$                 | $\chi^2=0.03, p=0.90$                  | $\chi^2=0.5, p=0.5$         |
| <i>F</i>                                    | 90         | 35          | 30         |                                       |                                        |                             |
| <i>M</i>                                    | 118        | 48          | 32         |                                       |                                        |                             |
| <i>Handedness, No</i>                       |            |             |            | $\chi^2=9.7, p=0.05$                  | $\chi^2=7.2, p=0.03$                   | $\chi^2=0.5, p=0.78$        |
| <i>L</i>                                    | 27         | 21          | 6          |                                       |                                        |                             |
| <i>R</i>                                    | 181        | 62          | 56         |                                       |                                        |                             |
| <i>Race, No</i>                             |            |             |            | $\chi^2=39.8, p=0.0005$               | $\chi^2=32, p=0.0005$                  | $\chi^2=21.3, p=0.0005$     |
| <i>Caucasian</i>                            | 173        | 43          | 36         |                                       |                                        |                             |
| <i>African</i>                              | 19         | 23          | 11         |                                       |                                        |                             |
| <i>Asian</i>                                | 6          | 5           | 3          |                                       |                                        |                             |
| <i>Hispanic</i>                             | 7          | 6           | 6          |                                       |                                        |                             |
| <i>Other</i>                                | 3          | 6           | 6          |                                       |                                        |                             |
| <i>IQ, mean (SD)</i>                        | 114 (12.8) | 74.5 (18.7) | -          |                                       | t-statistic=19.7, p=0.0005             |                             |
| <i>VOCABULARY SCORE, mean (SD)</i>          | 12.3 (2.8) | 6.4 (3.55)  | 11.2 (2.9) | F=105.8, P=0.0005                     | t-statistic=14.5, p=0.0005             | t-statistic=2.4, p=0.02     |
| <i>SES</i>                                  | 42 (19.9)  | 60 (30.2)   | 55 (26.5)  | F=21.5, P=0.0005                      | t-statistic=-6.3, p=0.0005             | t-statistic=-4.44, p=0.0005 |
| <i>Total number of scans</i>                | 475        | 193         | 124        |                                       |                                        |                             |
| <i>Number of scans, No</i>                  |            |             |            |                                       |                                        |                             |
| <i>1 scan</i>                               | 67         | 22          | 29         |                                       |                                        |                             |
| <i>2 scans</i>                              | 61         | 23          | 13         |                                       |                                        |                             |
| <i>≥3 scans</i>                             | 80         | 38          | 29         |                                       |                                        |                             |
| <i>Age at each scan in years, mean (SD)</i> |            |             |            |                                       |                                        |                             |
| <i>1st scan</i>                             | 12.6 (2.9) | 14.6 (2.3)  | 14.3 (3.9) | F=16.2, P=0.0005                      | t-statistic=-5.4, p=0.0005             | t-statistic=-3.7, p=0.0005  |

|                                                    |                         |                         |                        |                  |                               |                          |
|----------------------------------------------------|-------------------------|-------------------------|------------------------|------------------|-------------------------------|--------------------------|
| 2nd scan                                           | 15.1 (2.8)              | 17.1 (2.5)              | 15.9 (3.4)             | F=10.3, P=0.0005 | t-statistic=-4.7,<br>p=0.0005 | t-statistic=-1.5, p=0.13 |
| 3rd scan                                           | 17.2 (2.6)              | 18.5 (2.4)              | 18.2 (2.7)             | F=4.0, P=0.02    | t-statistic=-2.7, p=0.01      | t-statistic=-1.6, p=0.12 |
| 4th scan                                           | 18.7 (2.4)              | 20.5 (1.4)              | 20.5 (2.2)             | F=3.4, P=0.05    | t-statistic=-2.1, p=0.04      | t-statistic=-1.8, p=0.08 |
| <i>Age distribution of scans, years</i>            |                         |                         |                        |                  |                               |                          |
| Mean (SD)                                          | 14.7 (3.6)              | 16.7 (3.0)              | 15.8 (3.9)             |                  |                               |                          |
| Range                                              | 9.0-22.8                | 9.2-22.9                | 9.1-22.7               |                  |                               |                          |
| <i>Genotype, No participants</i>                   |                         |                         |                        |                  | $\chi^2=6.7, p=0.04$          | $\chi^2=1.5, p=0.5$      |
| MM                                                 | 60                      | 12                      | 13                     |                  |                               |                          |
| VM                                                 | 91                      | 42                      | 30                     |                  |                               |                          |
| VV                                                 | 57                      | 29                      | 19                     |                  |                               |                          |
| <b>Test for difference between genotype groups</b> |                         |                         |                        |                  |                               |                          |
| Sex                                                | $\chi^2= 3.3, p=0.22$   | $\chi^2 = 8.6, p=0.13$  | $\chi^2 = 1.5, p=0.48$ |                  |                               |                          |
| Handedness                                         | $\chi^2 = 2.4, p=0.67$  | $\chi^2 = 5.1, p=0.28$  | $\chi^2 = 2.3, p=0.68$ |                  |                               |                          |
| Race                                               | $\chi^2 = 17.0, p=0.03$ | $\chi^2 = 11.9, p=0.15$ | $\chi^2 = 3.3, p=0.91$ |                  |                               |                          |
| IQ                                                 | F=0.05, p=0.96          | F=0.5, p=0.62           | F=0.5, p=0.61          |                  |                               |                          |
| SES                                                | F=2.2, p=0.11           | F=2.2, p=0.12           | F=0.5, p=0.60          |                  |                               |                          |
| <i>Age at each scan</i>                            |                         |                         |                        |                  |                               |                          |
| 1st scan                                           | F=0.72, p=0.5           | F=2.1, p=0.13           | F=2.4, p=0.10          |                  |                               |                          |
| 2nd scan                                           | F=1.91, p=0.15          | F=1.7, p=0.20           | F=0.6, p=0.58          |                  |                               |                          |
| 3rd scan                                           | F=1.33, p=0.27          | F=0.2, p=0.84           | F=1.1, p=0.35          |                  |                               |                          |

**Full details of Study Participant Characteristics.** Socioeconomic status (SES) was quantified using Hollingshead scales (Hollingshead, 1975). Participants were of mixed handedness (handedness established using Physical and Neurological Examination of Soft Signs).

SUPPLEMENTARY TABLE 2

| CONTRAST                                                                                                 | REGIONS                                                                                                             | PEAK VERTEX: MNI CO-ORDINATES |     |     | BRODMANN AREA |
|----------------------------------------------------------------------------------------------------------|---------------------------------------------------------------------------------------------------------------------|-------------------------------|-----|-----|---------------|
|                                                                                                          |                                                                                                                     | X                             | Y   | Z   |               |
| <b><i>Differences in rate of CT change in HCs according to Val dose</i></b>                              | Left dorsolateral prefrontal cortex, extending through frontal pole, medial superior frontal and cingulate cortices | -25                           | 53  | -1  | 10            |
|                                                                                                          | Left superior temporal gyrus                                                                                        | -56                           | -2  | -11 | 22            |
|                                                                                                          | Left planum temporale                                                                                               | -54                           | -32 | 14  | 41            |
|                                                                                                          | Left inferior temporal gyrus                                                                                        | -60                           | -44 | -18 | 20            |
|                                                                                                          | Left primary sensorimotor cortices                                                                                  | -41                           | -32 | 68  | 2             |
|                                                                                                          | Left superior parietal lobule into intraparietal lobule                                                             | -27                           | -75 | 44  | 19            |
|                                                                                                          | Left medial occipital cortex                                                                                        | -11                           | -77 | -6  | 18            |
|                                                                                                          | Left parahippocampal cortex                                                                                         | -28                           | -20 | -30 | 36            |
|                                                                                                          | Right dorsolateral prefrontal cortex, extending through frontal pole into medial superior frontal                   | 24                            | 67  | 6   | 10            |
|                                                                                                          | Right cingulate cortices extending into precuneus                                                                   | 3                             | -33 | 39  | 31            |
|                                                                                                          | Right contiguous medial temporal region                                                                             | 17                            | -30 | -15 |               |
|                                                                                                          | Right superior temporal sulcus                                                                                      | 61                            | -28 | -6  | 21            |
|                                                                                                          | Right inferior frontal                                                                                              | 48                            | 19  | 25  | 46            |
| <b><i>Differences between HCs and COS probands in the influence of Val dose on rate of CT change</i></b> | Left inferior frontal                                                                                               | -43                           | 42  | 2   | 46            |
|                                                                                                          | Left medial superior frontal extending into cingulate and supplementary motor cortex                                | -9                            | -12 | 51  | 6             |
|                                                                                                          | Right medial superior frontal extending into cingulate                                                              | 7                             | -2  | 48  | 24            |

**Differences between HCs and SIBs in the influence of Val dose on rate of CT change**

|                                                         |     |     |     |    |
|---------------------------------------------------------|-----|-----|-----|----|
| Left inferior frontal                                   | -44 | 50  | -11 | 10 |
| Left precentral sulcus                                  | -61 | 9   | 20  | 44 |
| Left inferior temporal gyrus                            | -61 | -45 | -18 | 20 |
| Left superior parietal lobule into intraparietal lobule | -26 | -75 | 37  | 19 |
| Left parahippocampal cortex                             | -29 | -20 | -29 | 36 |
| Right anterior cingulate                                | 3   | 18  | -8  | 25 |
| Right inferior frontal gyrus                            | 41  | 45  | -16 | 47 |
| Right inferior frontal sulcus                           | 43  | 20  | 24  | 9  |
| Right superior temporal sulcus                          | 60  | -32 | -6  | 21 |
| Right middle temporal sulcus                            | 53  | -57 | 6   | 37 |
| Right temporo-occipital junction                        | 36  | -85 | 2   | 18 |

**Differences between SIBs and COS probands in the influence of Val dose on rate of CT change**

|                              |     |     |    |    |
|------------------------------|-----|-----|----|----|
| Left intraparietal sulcus    | -26 | -82 | 21 | 19 |
| Right middle temporal sulcus | 50  | -57 | 5  | 37 |

---

*Test-statistics, Stereotactic Coordinates corresponding Brodmann Areas labels for Cortical Regions Shown in Figures 1, 2 and 3, and. The co-ordinates are given in MNI space for the maximum vertex within each contiguous cortical region where statistically significant effects were found. Corresponding Brodmann areas (BA) were determined by converting to Talairach co-ordinates. Talairach Daemon and visual inspection of the Talairach atlas were used to assign BA label to each vertex of interest.*
